# Supplementary material
Source: MDPI journal article supplement (https://www.mdpi.com/2306-5338/7/4/88)
Supplement: s1 [file s1]

## Sheet: Table S1
Table S1. Biweekly Samples
	Sample	Latitude* (°N)	Longitude* (°W)	Sampling Date	δ2H (‰, V-SMOW)	SD	δ18O (‰, V-SMOW)	SD
	Provo River	40.2381	-111.722	2015-03-05	-119.943	0.275972	-15.9048	0.0356162
	Provo River	40.2381	-111.722	2015-03-22	-117.854	0.201658	-15.6668	0.0263271
	Provo River	40.2381	-111.722	2015-04-05	-118.712	0.487184	-15.8101	0.0343681
	Provo River	40.2381	-111.722	2015-04-19	-118.399	0.381164	-15.7702	0.0730373
	Provo River	40.2381	-111.722	2015-05-01	-119.345	0.433436	-16.0515	0.0662856
	Provo River	40.2381	-111.722	2015-05-17	-120.215	0.39667	-16.4473	0.126836
	Provo River	40.2381	-111.722	2015-05-30	-118.467	0.765121	-16.0097	0.235569
	Provo River	40.2381	-111.722	2015-06-13	-119.078	0.842309	-16.0711	0.0803109
	Provo River	40.2381	-111.722	2015-06-28	-118.646	0.197133	-15.9082	0.0515402
	Provo River	40.2381	-111.722	2015-07-11	-119.384	0.4721	-16.2446	0.0550298
	Provo River	40.2381	-111.722	2015-07-22	-119.404	0.384004	-16.2491	0.10121
	Provo River	40.2381	-111.722	2015-08-08	-119.694	0.817186	-16.4383	0.211794
	Provo River	40.2381	-111.722	2015-08-22	-119.766	0.390115	-16.3223	0.0654388
	Provo River	40.2381	-111.722	2015-09-04	-119.974	0.464695	-16.2633	0.0313985
	Provo River	40.2381	-111.722	2015-09-19	-118.656	0.632284	-16.2758	0.222094
	Provo River	40.2381	-111.722	2015-10-04	-119.029	1.16968	-16.5526	0.286352
	Provo River	40.2381	-111.722	2015-10-18	-118.702	1.23195	-16.8108	0.228687
	Provo River	40.2381	-111.722	2015-10-31	-117.191	0.184927	-15.8093	0.0341091
	Provo River	40.2381	-111.722	2015-11-14	-117.23	0.145073	-15.6856	0.083159
	Provo River	40.2381	-111.722	2015-11-29	-116.934	0.233748	-15.4094	0.249751
	Provo River	40.2381	-111.722	2015-12-12	-117.78	0.0913617	-15.7727	0.082242
	Provo River	40.2381	-111.722	2016-01-10	-118.002	0.172252	-15.7953	0.126704
	Provo River	40.2381	-111.722	2016-01-23	-119.684	0.13778	-16.1277	0.0128515
	Provo River	40.2381	-111.722	2016-02-07	-119.11	0.184747	-15.8924	0.0627546
	Provo River	40.2381	-111.722	2016-02-21	-119.659	0.0668568	-16.1508	0.12557
	Provo River	40.2381	-111.722	2016-03-06	-119.21	0.234676	-16.3478	0.0518783
	Provo Groundwater	40.24	-111.718	2015-03-05	-123.538	0.231497	-16.454	0.0632731
	Provo Groundwater	40.24	-111.718	2015-03-22	-125.909	0.230894	-17.0083	0.158264
	Provo Groundwater	40.24	-111.718	2015-04-05	-125.265	0.325942	-16.8876	0.0678886
	Provo Groundwater	40.24	-111.718	2015-04-19	-125.835	0.624992	-16.7004	0.14633
	Provo Groundwater	40.24	-111.718	2015-05-01	-126.955	0.0462724	-17.3892	0.0318632
	Provo Groundwater	40.24	-111.718	2015-05-17	-125.624	0.137825	-17.1552	0.0165953
	Provo Groundwater	40.24	-111.718	2015-05-30	-125.807	0.0722791	-17.1008	0.0460465
	Provo Groundwater	40.24	-111.718	2015-06-13	-126.336	0.274798	-17.2158	0.064933
	Provo Groundwater	40.24	-111.718	2015-06-28	-126.466	0.309722	-17.2016	0.314993
	Provo Groundwater	40.24	-111.718	2015-07-11	-127.538	0.72628	-17.6485	0.0506116
	Provo Groundwater	40.24	-111.718	2015-07-22	-126.311	0.0314787	-17.2408	0.038462
	Provo Groundwater	40.24	-111.718	2015-08-08	-126.044	0.300242	-17.0576	0.131383
	Provo Groundwater	40.24	-111.718	2015-08-22	-126.321	0.40534	-17.053	0.124505
	Provo Groundwater	40.24	-111.718	2015-09-04	-126.463	0.133521	-17.2416	0.145173
	Provo Groundwater	40.24	-111.718	2015-09-19	-125.939	0.0582156	-17.0706	0.101112
	Provo Groundwater	40.24	-111.718	2015-10-04	-126.282	0.386521	-17.2034	0.0607722
	Provo Groundwater	40.24	-111.718	2015-10-18	-126.352	0.372522	-17.0575	0.0269487
	Provo Groundwater	40.24	-111.718	2015-10-31	-126.393	0.259016	-16.9128	0.0614027
	Provo Groundwater	40.24	-111.718	2015-11-14	-125.876	0.199812	-16.8903	0.0661748
	Provo Groundwater	40.24	-111.718	2015-11-29	-126.672	1	-16.9905	0.2
	Provo Groundwater	40.24	-111.718	2015-12-12	-126.707	0.183777	-17.4784	0.0139754
	Provo Groundwater	40.24	-111.718	2015-12-30	-126.244	0.212142	-17.1027	0.128226
	Provo Groundwater	40.24	-111.718	2016-01-10	-126.393	0.0558612	-17.0375	0.0428617
	Provo Groundwater	40.24	-111.718	2016-01-23	-126.465	0.22852	-17.1996	0.00668447
	Provo Groundwater	40.24	-111.718	2016-02-07	-126.26	0.139918	-16.9988	0.032235
	Provo Groundwater	40.24	-111.718	2016-02-21	-126.444	0.337633	-16.806	0.216389
	Provo Groundwater	40.24	-111.718	2016-03-06	-126.459	0.196961	-17.1217	0.0875993
	Jordan River	40.3567	-111.899	2015-03-05	-80.108	0.0602076	-8.6641	0.0876004
	Jordan River	40.3567	-111.899	2015-03-22	-75.3479	0.204886	-7.48818	0.10602
	Jordan River	40.3567	-111.899	2015-04-05	-72.2963	0.361681	-6.19112	0.784959
	Jordan River	40.3567	-111.899	2015-04-19	-97.8706	0.117297	-12.2054	0.0556269
	Jordan River	40.3567	-111.899	2015-05-01	-88.5511	0.458161	-10.4761	0.0491633
	Jordan River	40.3567	-111.899	2015-05-17	-117.283	0.577063	-15.7786	0.0514111
	Jordan River	40.3567	-111.899	2015-05-30	-117.066	0.507974	-15.6485	0.0930584
	Jordan River	40.3567	-111.899	2015-06-13	-70.1004	0.869885	-7.28	0.0871351
	Jordan River	40.3567	-111.899	2015-06-28	-86.2121	0.503712	-9.75393	0.0812977
	Jordan River	40.3567	-111.899	2015-07-11	-84.0513	0.185447	-9.80041	0.0905223
	Jordan River	40.3567	-111.899	2015-07-22	-57.286	1.55895	-4.84141	0.146962
	Jordan River	40.3567	-111.899	2015-08-08	-80.3947	0.322651	-8.89208	0.0528015
	Jordan River	40.3567	-111.899	2015-08-22	-79.453	0.66805	-8.73281	0.0706074
	Jordan River	40.3567	-111.899	2015-09-04	-90.5622	0.974861	-10.9618	0.195662
	Jordan River	40.3567	-111.899	2015-09-19	-87.4027	0.463813	-10.6215	0.0706094
	Jordan River	40.3567	-111.899	2015-10-04	-94.1682	0.969625	-11.7131	0.128671
	Jordan River	40.3567	-111.899	2015-10-18	-90.6529	1.00413	-11.0036	0.0929539
	Jordan River	40.3567	-111.899	2015-10-31	-95.5396	1.47892	-12.0064	0.342088
	Jordan River	40.3567	-111.899	2015-11-14	-93.5801	0.622656	-11.7607	0.124843
	Jordan River	40.3567	-111.899	2015-11-29	-96.9033	1.12956	-12.3244	0.147417
	Jordan River	40.3567	-111.899	2015-12-12	-89.3466	0.332088	-10.5952	0.360615
	Jordan River	40.3567	-111.899	2016-01-10	-103.667	0.0109316	-13.3395	0.120632
	Jordan River	40.3567	-111.899	2016-01-23	-105.278	0.173425	-13.5557	0.100168
	Jordan River	40.3567	-111.899	2016-02-07	-104.685	0.265599	-13.1255	0.249215
	Jordan River	40.3567	-111.899	2016-02-21	-105.762	0.0286168	-13.1011	0.0683439
	Jordan River	40.3567	-111.899	2016-03-06	-86.1211	0.234698	-9.67006	0.301273
	Spanish Fork River	40.1503	-111.726	2015-03-05	-113.468	0.185892	-14.4031	0.042869
	Spanish Fork River	40.1503	-111.726	2015-03-22	-112.078	0.308492	-14.3648	0.16487
	Spanish Fork River	40.1503	-111.726	2015-04-05	-112.737	0.428586	-14.2513	0.112893
	Spanish Fork River	40.1503	-111.726	2015-04-19	-109.545	0.449915	-14.1106	0.0200256
	Spanish Fork River	40.1503	-111.726	2015-05-01	-112.123	0.0429021	-14.6381	0.075524
	Spanish Fork River	40.1503	-111.726	2015-05-17	-114.456	0.74192	-15.3969	0.206753
	Spanish Fork River	40.1503	-111.726	2015-05-30	-112.003	1.22149	-14.8049	0.313712
	Spanish Fork River	40.1503	-111.726	2015-06-13	-109.878	0.683326	-14.1987	0.0485136
	Spanish Fork River	40.1503	-111.726	2015-06-28	-109.146	0.111844	-14.2656	0.0370446
	Spanish Fork River	40.1503	-111.726	2015-07-11	-105.25	0.169863	-13.5246	0.043183
	Spanish Fork River	40.1503	-111.726	2015-07-22	-107.837	0.660907	-13.9361	0.0682198
	Spanish Fork River	40.1503	-111.726	2015-08-08	-111.779	0.624608	-14.5568	0.0510902
	Spanish Fork River	40.1503	-111.726	2015-08-22	-110.363	0.48803	-14.4136	0.0983303
	Spanish Fork River	40.1503	-111.726	2015-09-04	-108.162	0.320564	-14.0311	0.0396018
	Spanish Fork River	40.1503	-111.726	2015-09-19	-110.651	0.346233	-14.7987	0.133564
	Spanish Fork River	40.1503	-111.726	2015-10-04	-110.05	0.95703	-14.6317	0.166384
	Spanish Fork River	40.1503	-111.726	2015-10-18	-115.175	0.376129	-15.9204	0.246717
	Spanish Fork River	40.1503	-111.726	2015-10-31	-114.591	0.180591	-14.9926	0.0267592
	Spanish Fork River	40.1503	-111.726	2015-11-14	-114.081	0.0778805	-14.8004	0.121033
	Spanish Fork River	40.1503	-111.726	2015-11-29	-114.449	0.283639	-14.9535	0.0887673
	Spanish Fork River	40.1503	-111.726	2015-12-12	-115.413	0.128857	-15.3339	0.0579366
	Spanish Fork River	40.1503	-111.726	2016-01-10	-115.293	0.126845	-15.138	0.0600111
	Spanish Fork River	40.1503	-111.726	2016-01-23	-114.779	0.186875	-14.8658	0.0974808
	Spanish Fork River	40.1503	-111.726	2016-02-07	-115.774	0.420152	-15.1002	0.113427
	Spanish Fork River	40.1503	-111.726	2016-02-21	-115.922	0.0266283	-15.2419	0.0404093
	Spanish Fork River	40.1503	-111.726	2016-03-06	-115.623	0.342649	-15.177	0.066755
	Utah Lake	40.3161	-111.766	2015-03-05	-78.9976	0.219169	-8.50101	0.0913595
	Utah Lake	40.3161	-111.766	2015-03-22	-73.0634	0.359497	-7.97967	0.0698054
	Utah Lake	40.3161	-111.766	2015-04-05	-69.7387	0.184292	-6.89269	0.0601707
	Utah Lake	40.3161	-111.766	2015-04-19	-80.4341	0.380277	-8.98135	0.0398508
	Utah Lake	40.3161	-111.766	2015-05-01	-75.3297	0.716784	-8.0658	0.0620166
	Utah Lake	40.3161	-111.766	2015-05-17	-85.6822	0.489399	-10.0709	0.05331
	Utah Lake	40.3161	-111.766	2015-05-30	-83.9626	0.499238	-9.61269	0.126298
	Utah Lake	40.3161	-111.766	2015-06-13	-80.5145	0.591472	-9.02555	0.0869959
	Utah Lake	40.3161	-111.766	2015-06-28	-71.3637	0.351334	-7.29194	0.0465372
	Utah Lake	40.3161	-111.766	2015-07-11	-63.6143	0.322307	-5.96172	0.0977375
	Utah Lake	40.3161	-111.766	2015-07-22	-60.2949	0.733514	-5.24394	0.0551812
	Utah Lake	40.3161	-111.766	2015-08-08	-63.3951	0.970116	-5.89747	0.135026
	Utah Lake	40.3161	-111.766	2015-08-22	-60.8344	0.372629	-5.38521	0.0364168
	Utah Lake	40.3161	-111.766	2015-09-04	-86.9038	0.10277	-10.1966	0.0167913
	Utah Lake	40.3161	-111.766	2015-09-19	-69.6891	0.391207	-7.26604	0.0600268
	Utah Lake	40.3161	-111.766	2015-10-04	-89.1445	0.538642	-11.2899	0.0669947
	Utah Lake	40.3161	-111.766	2015-10-18	-65.3208	0.831471	-6.62985	0.211848
	Utah Lake	40.3161	-111.766	2015-10-31	-65.4719	0.499064	-6.83512	0.110762
	Utah Lake	40.3161	-111.766	2015-11-14	-73.7541	0.766507	-8.33899	0.0531003
	Utah Lake	40.3161	-111.766	2015-11-29	-67.241	1.0765	-7.27143	0.144728
	Utah Lake	40.3161	-111.766	2015-12-12	-84.7656	0.151739	-9.92751	0.0241749
	Utah Lake	40.3161	-111.766	2016-01-10	-74.2719	0.240632	-7.95827	0.0438999
	Utah Lake	40.3161	-111.766	2016-01-23	-94.0021	0.687734	-11.4899	0.321609
	Utah Lake	40.3161	-111.766	2016-02-07	-97.9581	0.0916255	-12.2944	0.0880488
	Utah Lake	40.3161	-111.766	2016-02-21	-79.5326	0.10176	-8.93665	0.0395152
	Utah Lake	40.3161	-111.766	2016-03-06	-80.2437	0.159663	-9.01766	0.0399667
	Hobble Creek	40.1789	-111.638	2015-03-05	-121.539	0.274731	-16.3729	0.0268598
	Hobble Creek	40.1789	-111.638	2015-03-22	-120.95	0.187626	-16.3367	0.114206
	Hobble Creek	40.1789	-111.638	2015-04-05	-121.453	0.143122	-16.2531	0.0485577
	Hobble Creek	40.1789	-111.638	2015-04-19	-122.099	0.392448	-16.6633	0.0385534
	Hobble Creek	40.1789	-111.638	2015-05-01	-103.562	0.298458	-13.0588	0.063553
	Hobble Creek	40.1789	-111.638	2015-05-17	-104.727	0.634576	-13.3663	0.0579187
	Hobble Creek	40.1789	-111.638	2015-05-30	-104.199	1.4064	-12.8138	0.307748
	Hobble Creek	40.1789	-111.638	2015-06-13	-104.167	1.03751	-13.1358	0.0640375
	Hobble Creek	40.1789	-111.638	2015-06-28	-103.23	0.359359	-13.1147	0.0645451
	Hobble Creek	40.1789	-111.638	2015-07-11	-103.98	0.501156	-13.1409	0.0236809
	Hobble Creek	40.1789	-111.638	2015-07-22	-105.264	0.908939	-13.4543	0.145716
	Hobble Creek	40.1789	-111.638	2015-08-08	-103.65	0.415935	-13.2674	0.0189393
	Hobble Creek	40.1789	-111.638	2015-08-22	-104.127	0.694589	-13.3815	0.228504
	Hobble Creek	40.1789	-111.638	2015-09-04	-103.977	0.257632	-13.3866	0.151988
	Hobble Creek	40.1789	-111.638	2015-09-19	-108.924	0.563939	-14.7228	0.350189
	Hobble Creek	40.1789	-111.638	2015-10-04	-120.511	0.339554	-16.8014	0.0189926
	Hobble Creek	40.1789	-111.638	2015-10-18	-120.389	0.356694	-16.8957	0.0662556
	Hobble Creek	40.1789	-111.638	2015-10-31	-119.665	0.423011	-16.2477	0.0444494
	Hobble Creek	40.1789	-111.638	2015-11-14	-119.385	0.0103747	-15.8743	0.0715906
	Hobble Creek	40.1789	-111.638	2015-11-29	-121.944	0.204203	-16.7429	0.0919623
	Hobble Creek	40.1789	-111.638	2015-12-12	-120.723	0.123309	-16.3565	0.0606392
	Hobble Creek	40.1789	-111.638	2015-12-30	-120.449	0.400661	-16.2851	0.0313427
	Hobble Creek	40.1789	-111.638	2016-01-10	-121.603	0.215478	-16.2757	0.291772
	Hobble Creek	40.1789	-111.638	2016-01-23	-122.106	0.155499	-16.1342	0.105362
	Hobble Creek	40.1789	-111.638	2016-02-07	-121.873	0.101287	-16.3564	0.014872
	Hobble Creek	40.1789	-111.638	2016-02-21	-122.124	0.440014	-16.5579	0.0468111
	Hobble Creek	40.1789	-111.638	2016-03-06	-122.514	0.0953291	-16.6052	0.108427
	American Fork River	40.355	-111.801	2015-03-05	-120.943	0.247659	-16.3242	0.049101
	American Fork River	40.355	-111.801	2015-03-22	-120.87	0.137234	-16.449	0.0661898
	American Fork River	40.355	-111.801	2015-04-05	-118.662	0.260739	-16.1025	0.127271
	American Fork River	40.355	-111.801	2015-04-19	-120.15	0.857958	-16.411	0.109729
	American Fork River	40.355	-111.801	2015-05-01	-120.309	0.572583	-16.6033	0.129794
	American Fork River	40.355	-111.801	2015-05-17	-119.211	0.531934	-16.3225	0.0487982
	American Fork River	40.355	-111.801	2015-05-30	-120.097	0.524577	-16.8831	0.127915
	American Fork River	40.355	-111.801	2015-06-13	-120.671	0.816674	-16.9427	0.0777228
	American Fork River	40.355	-111.801	2015-06-28	-122.264	0.635549	-16.7003	0.125106
	American Fork River	40.355	-111.801	2015-07-11	-120.469	0.604062	-16.8932	0.0940368
	American Fork River	40.355	-111.801	2015-07-22	-120.724	0.330771	-16.9285	0.091858
	American Fork River	40.355	-111.801	2015-08-08	-121.512	0.52961	-16.9415	0.0074882
	American Fork River	40.355	-111.801	2015-08-22	-120.845	0.732667	-16.7069	0.0487705
	American Fork River	40.355	-111.801	2015-09-04	-121.3	0.720333	-17.0031	0.204406
	American Fork River	40.355	-111.801	2015-09-19	-121.74	0.439307	-17.1659	0.102191
	American Fork River	40.355	-111.801	2015-10-04	-121.287	0.249672	-17.4015	0.0345041
	American Fork River	40.355	-111.801	2015-10-18	-121.15	0.373583	-17.0986	0.0398936
	American Fork River	40.355	-111.801	2015-10-31	-118.302	0.68182	-16.1674	0.458435
	American Fork River	40.355	-111.801	2015-11-14	-118.058	0.0356782	-16.3792	0.126274
	American Fork River	40.355	-111.801	2015-11-29	-118.007	0.151464	-16.1403	0.172565
	American Fork River	40.355	-111.801	2015-12-12	-118.148	0.135803	-15.9949	0.0516062
	American Fork River	40.355	-111.801	2016-01-10	-118.029	0.228832	-15.9995	0.049964
	American Fork River	40.355	-111.801	2016-01-23	-118.184	0.228582	-16.0788	0.0754515
	American Fork River	40.355	-111.801	2016-02-07	-118.133	0.191407	-16.1048	0.0470407
	American Fork River	40.355	-111.801	2016-02-21	-119.014	0.512001	-16.1488	0.0288898
	American Fork River	40.355	-111.801	2016-03-06	-118.931	0.25909	-16.1075	0.168461
	Saratoga Springs Hot Spring	40.3531	-111.9	2015-04-05	-125.62	0.17965	-16.9526	0.175039
	Saratoga Springs Hot Spring	40.3531	-111.9	2015-04-19	-125.758	0.170917	-16.7851	0.157038
	Saratoga Springs Hot Spring	40.3531	-111.9	2015-05-01	-125.512	0.195374	-16.6913	0.0959107
	Saratoga Springs Hot Spring	40.3531	-111.9	2015-05-17	-125.653	0.0564658	-16.4777	0.14471
	Saratoga Springs Hot Spring	40.3531	-111.9	2015-05-30	-124.981	0.21101	-16.3724	0.00345068
	Saratoga Springs Hot Spring	40.3531	-111.9	2015-06-13	-125.068	0.411375	-16.5591	0.0260594
	Saratoga Springs Hot Spring	40.3531	-111.9	2015-06-28	-126.875	0.569271	-17.1332	0.0499064
	Saratoga Springs Hot Spring	40.3531	-111.9	2015-07-11	-124.196	0.0856014	-16.7038	0.0368679
	Saratoga Springs Hot Spring	40.3531	-111.9	2015-07-22	-125.351	0.264495	-16.7912	0.168731
	Saratoga Springs Hot Spring	40.3531	-111.9	2015-08-08	-125.199	0.452829	-16.6818	0.0974725
	Saratoga Springs Hot Spring	40.3531	-111.9	2015-08-22	-125.939	0.0930329	-16.6981	0.119251
	Saratoga Springs Hot Spring	40.3531	-111.9	2015-09-04	-125.695	0.0945558	-16.5622	0.0499257
	Saratoga Springs Hot Spring	40.3531	-111.9	2015-09-19	-125.347	0.32926	-16.6078	0.00798277
	Saratoga Springs Hot Spring	40.3531	-111.9	2015-10-04	-125.451	0.222401	-16.5477	0.118408
	Saratoga Springs Hot Spring	40.3531	-111.9	2015-10-18	-125.367	0.15227	-16.4325	0.110163
	Saratoga Springs Hot Spring	40.3531	-111.9	2015-10-31	-125.511	0.215425	-16.5974	0.0725021
	Saratoga Springs Hot Spring	40.3531	-111.9	2015-11-14	-125.45	0.144575	-16.7345	0.0471603
	Saratoga Springs Hot Spring	40.3531	-111.9	2015-11-29	-125.197	0.0857898	-16.6035	0.0934252
	Saratoga Springs Hot Spring	40.3531	-111.9	2015-12-12	-125.634	0.199691	-16.6805	0.0311264
	Saratoga Springs Hot Spring	40.3531	-111.9	2015-12-30	-126.088	0.081516	-16.6733	0.0840502
	Saratoga Springs Hot Spring	40.3531	-111.9	2016-01-10	-126.121	0.0566711	-16.6542	0.0916056
	Saratoga Springs Hot Spring	40.3531	-111.9	2016-01-23	-125.98	0.142756	-16.7193	0.0469418
	Saratoga Springs Hot Spring	40.3531	-111.9	2016-02-07	-125.499	0.363006	-16.5408	0.0586155
	Saratoga Springs Hot Spring	40.3531	-111.9	2016-02-21	-126.357	0.185739	-16.7516	0.0685729
	Saratoga Springs Hot Spring	40.3531	-111.9	2016-03-06	-125.656	0.185187	-16.5352	0.0325663
	*WGS 84 Datum

## Sheet: Table S2
Table S2. Meteoric Precipitation
	Month	Latitude* (°N)	Longitude* (°W)	Measured Amount (mm)	δ2H (‰, V-SMOW)	SD	δ18O (‰, V-SMOW)	SD
	April 2015	40.2778	-111.715	28.6435	-108.693	0.631456	-15.2034	0.0449998
	May 2015	40.2778	-111.715	50.3008	-83.2043	0.694097	-11.7247	0.137197
	June 2015	40.2778	-111.715	20.6094	-82.3446	0.39441	-11.0066	0.0380626
	July 2015	40.2778	-111.715	18.5135	-45.741	0.533124	-7.83072	0.0387771
	August 2015	40.2778	-111.715	21.6573	-66.9492	0.84936	-9.67322	0.196863
	September 2015	40.2778	-111.715	21.308	-79.7626	0.657165	-12.084	0.2289
	October 2015	40.2778	-111.715	18.1642	-68.5841	0.879831	-11.0702	0.22552
	November 2015	40.2778	-111.715	23.0545	-78.6579	0.259312	-12.312	0.0490076
	December 2015	40.2778	-111.715	47.5063	-127.606	0.194988	-16.9343	0.0788908
	January 2016	40.2778	-111.715	41.9174	-148.593	0.288237	-18.89	0.726622
	February 2016	40.2778	-111.715	5.58898	-128.279	0.123635	-15.8396	0.18904
	March 2016	40.2778	-111.715	17.1163	-92.0577	0.0192082	-12.5799	0.0728993
	*WGS 84 Datum

## Sheet: Table S3
Table S3. Utah Lake Depth Profiles
	Sampling Date	Latitude* (°N)	Longitude* (°W)	Depth (m)	δ2H (‰, V-SMOW)	SD	δ18O (‰, V-SMOW)	SD
	2015-04-04	40.1803	-111.803	0	-66.1355	0.349452	-6.43866	0.0674462
	2015-04-04	40.1803	-111.803	0.5	-66.5945	0.363344	-6.49947	0.0691586
	2015-04-04	40.1803	-111.803	1	-66.271	0.271718	-6.4989	0.0215956
	2015-04-04	40.1803	-111.803	1.5	-66.3982	0.383472	-6.56748	0.132074
	2015-04-04	40.1803	-111.803	2	-67.248	0.434601	-6.77698	0.1024
	2015-04-04	40.1803	-111.803	2.5	-66.7881	0.116917	-6.6459	0.0522431
	2015-04-04	40.1803	-111.803	3	-67.7247	0.731826	-6.88866	0.299985
	2015-04-04	40.1803	-111.803	3.5	-67.8762	0.449264	-6.92209	0.142741
	2015-07-01	40.1803	-111.803	0	-60.9609	0.610735	-5.54564	0.0979165
	2015-07-01	40.1803	-111.803	0.5	-62.0824	0.308237	-5.72848	0.0291759
	2015-07-01	40.1803	-111.803	1	-61.3004	0.450921	-5.71908	0.0834899
	2015-07-01	40.1803	-111.803	1.5	-61.3744	0.275758	-5.6749	0.0766533
	2015-07-01	40.1803	-111.803	2	-62.3368	0.126038	-5.85638	0.00473065
	2015-07-01	40.1803	-111.803	2.5	-61.9839	0.463504	-5.88944	0.127835
	2015-07-01	40.1803	-111.803	3	-61.7298	0.514387	-5.78692	0.0643865
	2015-07-01	40.1803	-111.803	3.5	-62.8275	0.988405	-6.13603	0.184188
	2015-07-01	40.1803	-111.803	4	-62.5509	0.24297	-5.97878	0.103032
	2015-11-21	40.1803	-111.803	0	-46.8904	0.141883	-2.99295	0.110568
	2015-11-21	40.1803	-111.803	0.5	-46.744	0.147355	-3.29325	0.106379
	2015-11-21	40.1803	-111.803	1	-46.89	0.255479	-3.3108	0.547815
	2015-11-21	40.1803	-111.803	1.5	-46.4811	0.0852279	-2.83852	0.187059
	2015-11-21	40.1803	-111.803	2	-46.8901	0.116903	-3.28537	0.0938003
	*WGS 84 Datum

## Sheet: Table S4
Table S4. Utah Lake Horizontal Profiles
	Latitude* (°N)	Longitude* (°W)	Sample Depth (cm)	Sampling Date	δ2H (‰, V-SMOW)	SD	δ18O (‰, V-SMOW)	SD
	40.1686	-111.75	10	2015-03-28	-103.919	0.316139	-12.9148	0.170602
	40.1686	-111.75	40	2015-03-28	-108.232	0.502443	-13.8275	0.129796
	40.1686	-111.75	40	2015-07-01	-60.2851	0.274444	-5.56226	0.0828535
	40.1686	-111.75	40	2015-11-21	-109.964	0.262354	-14.2415	0.213637
	40.3431	-111.804	10	2015-03-28	-72.9682	0.0687729	-7.69892	0.119145
	40.3431	-111.804	40	2015-03-28	-73.3297	0.345535	-7.79	0.0863838
	40.3431	-111.804	40	2015-07-01	-62.1365	0.466597	-5.88501	0.088927
	40.3431	-111.804	40	2015-11-21	-59.8237	0.338736	-5.48458	0.0870821
	40.3589	-111.894	10	2015-03-28	-71.6387	0.265057	-7.42253	0.131684
	40.3589	-111.894	40	2015-03-28	-71.5796	0.208982	-7.7989	0.0998252
	40.3589	-111.894	40	2015-07-01	-64.6412	0.294313	-6.47714	0.0753617
	40.3589	-111.894	40	2015-11-21	-51.6934	0.0542899	-4.13985	0.0907889
	40.2367	-111.743	40	2015-03-28	-118.896	0.766482	-15.9762	0.0162187
	40.2367	-111.743	10	2015-03-28	-119.186	0.950517	-16.3159	0.162573
	40.2367	-111.743	40	2015-07-01	-78.4905	0.667648	-8.89089	0.10342
	40.2367	-111.743	40	2015-11-21	-111.866	0.157039	-14.8906	0.0791035
	40.1794	-111.716	10	2015-03-28	-82.1878	0.955284	-9.42417	0.285126
	40.1794	-111.716	40	2015-03-28	-82.5743	0.807318	-9.5844	0.225235
	*WGS 84 Datum

## Sheet: Table S5
Table S5. Utah Valley Shallow Groundwater Wells
	Well ID	Sampling Date	Latitude* (°N)	Longitude* (°W)	δ2H (‰, V-SMOW)	SD	δ18O (‰, V-SMOW)	SD
	USW1	2014-06-16	40.1532	-111.73	-115.253	0.56756	-14.8817	0.0309047
	USW2	2014-06-16	40.1191	-111.73	-125.982	0.122256	-16.9004	0.022034
	USW3	2014-06-16	40.1186	-111.731	-110.358	0.579847	-14.0197	0.0820342
	USW4	2014-06-16	40.1175	-111.729	-125.243	0.027746	-16.8076	0.0187323
	USW5	2014-06-16	40.1177	-111.728	-112.292	0.0668961	-14.3472	0.00353886
	USW6	2014-06-17	40.1171	-111.73	-125.95	0.0110848	-16.9921	0.0247136
	USW7	2014-06-17	40.0555	-111.752	-118.681	0.0648439	-15.6493	0.00505619
	USW8	2014-06-17	40.0551	-111.752	-118.905	0.0340739	-15.6249	0.00996208
	USW9	2014-06-17	40.056	-111.748	-118.559	0.0747751	-15.6004	0.017838
	USW10	2014-06-17	40.0584	-111.756	-122.624	0.0986251	-16.322	0.0077566
	USW11	2014-06-18	40.0874	-111.73	-125.015	0.0202132	-16.8396	0.0131506
	USW12	2014-06-18	40.0894	-111.729	-114.45	0.00691124	-14.73	0.00063676
	USW13	2014-06-18	40.0894	-111.729	-125.19	0.0456368	-16.7707	0.0280873
	USW14	2014-06-18	40.0979	-111.732	-125.814	0.0152316	-16.8918	0.0126948
	USW15	2014-06-18	40.0977	-111.733	-115.312	0.131838	-14.9999	0.0139947
	USW16	2014-06-19	40.0594	-111.646	-121.762	0.343553	-16.1068	0.172146
	USW17	2014-06-19	40.0594	-111.646	-110.706	0.475048	-14.0676	0.198924
	USW18	2014-06-19	40.0487	-111.644	-122.101	0.333311	-16.5606	0.119473
	USW19	2014-06-19	40.3551	-111.797	-123.023	0.678483	-16.5235	0.0582209
	USW20	2014-06-19	40.3488	-111.802	-122.98	0.145079	-16.4654	0.0821991
	USW21	2014-06-20	40.3526	-111.802	-122.217	0.334455	-16.3635	0.0569096
	USW22	2014-06-20	40.354	-111.805	-122.981	0.642946	-16.4462	0.0407692
	USW23	2014-06-20	40.3727	-111.826	-121.174	0.19017	-16.2744	0.0399193
	USW24	2014-06-20	40.3727	-111.826	-121.58	0.0979644	-16.2871	0.0224947
	USW25	2014-06-20	40.3727	-111.826	-122.101	0.281565	-16.4456	0.0611375
	USW26	2014-06-23	40.3869	-111.867	-120.14	0.230257	-15.96	0.0708716
	USW27	2014-06-23	40.1198	-111.659	-113.206	1.18312	-14.8029	0.0542431
	USW28	2014-06-23	40.0983	-111.743	-123.069	0.106496	-16.2607	0.0517991
	USW29	2014-06-23	40.0926	-111.787	-116.102	3.00199	-15.0791	0.45362
	USW30	2014-06-24	40.2774	-111.719	-111.996	0.0133294	-14.2672	0.0334651
	USW31	2014-06-24	40.0729	-111.76	-123.144	0.0396336	-16.3219	0.0360919
	USW32	2014-06-24	40.0686	-111.761	-116.646	0.0211768	-15.1574	0.0167527
	USW33	2014-06-24	40.0686	-111.761	-119.608	0.0170437	-15.6393	0.054671
	USW34	2014-06-24	40.0708	-111.763	-122.476	0.316422	-16.0214	0.135047
	USW35	2014-06-24	40.0747	-111.646	-111.852	0.0310405	-14.2665	0.00995919
	USW36	2014-06-25	40.0591	-111.748	-120.252	0.280559	-15.7946	0.0704251
	USW37	2014-06-25	40.0637	-111.75	-122.707	0.258973	-16.2297	0.0887683
	USW38	2014-06-25	40.0636	-111.751	-120.815	4.12553	-15.8915	0.719652
	USW39	2014-06-25	40.0675	-111.756	-116.638	0.231715	-15.1982	0.067754
	USW40	2014-06-25	40.0675	-111.756	-120.507	0.131347	-15.8782	0.0589866
	USW41	2014-06-25	40.0675	-111.756	-117.799	0.0616016	-15.3897	0.0897334
	NOR1	2015-06-01	40.1539	-111.425	-123.298	0.0434066	-16.3638	0.024192
	NOR2	2015-06-01	40.1622	-111.433	-123.036	0.0434066	-16.3733	0.024192
	NOR3	2015-06-08	40.1541	-111.425	-122.93	0.0434066	-16.3068	0.024192
	NOR4	2015-06-08	40.154	-111.426	-122.982	0.0434066	-16.3317	0.024192
	NOR5	2015-06-15	40.152	-111.423	-124.796	0.0434066	-16.5918	0.024192
	NOR6	2015-06-15	40.1515	-111.423	-127.486	0.0434066	-16.9568	0.024192
	NOR7	2015-06-22	40.1521	-111.422	-119.616	0.0434066	-15.6355	0.024192
	NOR8	2015-06-22	40.152	-111.422	-121.358	0.0434066	-15.9949	0.024192
	NOR9	2015-06-29	40.1629	-111.425	-118.758	0.0434066	-15.4248	0.024192
	NOR10	2015-06-29	40.1629	-111.425	-118.823	0.0434066	-15.3868	0.024192
	NOR11	2015-07-06	40.2226	-111.504	-121.334	0.0434066	-16.1975	0.024192
	NOR12	2015-07-06	40.223	-111.504	-122.021	0.0434066	-16.4358	0.024192
	NOR13	2015-07-13	40.2241	-111.502	-122.119	0.0434066	-16.4591	0.024192
	NOR14	2015-07-13	40.2157	-111.53	-123.989	0.0434066	-16.6092	0.024192
	NOR15	2015-07-20	40.2356	-111.531	-123.581	0.0434066	-16.3871	0.024192
	NOR16	2015-07-20	20.1734	-111.444	-125.856	0.0434066	-16.9926	0.024192
	NOR17	2015-07-20	40.2252	-111.585	-128.096	0.0434066	-16.6437	0.024192
	NOR18	2015-07-21	40.2355	-111.521	-123.749	0.0434066	-16.4051	0.024192
	NOR19	2015-07-21	40.2354	-111.523	-123.534	0.0434066	-16.3584	0.024192
	NOR20	2015-07-21	40.154	-111.426	-123.332	0.0434066	-16.3577	0.024192
	SOU1	2015-06-01	40.167	-111.622	-126.402	0.0434066	-17.0417	0.024192
	SOU2	2015-06-01	40.1658	-111.622	-126.097	0.0434066	-16.9349	0.024192
	SOU3	2015-06-01	40.1655	-111.628	-126.057	0.0434066	-16.897	0.024192
	SOU4	2015-06-01	40.166	-111.626	-126.693	0.0434066	-17.046	0.024192
	SOU5	2015-06-01	40.1664	-111.933	-126.716	0.0434066	-16.9978	0.024192
	SOU6	2015-06-02	40.2403	-111.695	-127.189	0.0434066	-16.951	0.024192
	SOU7	2015-06-02	40.2338	-111.704	-127.698	0.0434066	-17.0194	0.024192
	SOU8	2015-06-05	40.2297	-111.704	-126.517	0.0434066	-16.8768	0.024192
	SOU9	2015-06-05	40.2299	-111.711	-126.921	0.0434066	-16.9203	0.024192
	SOU10	2015-06-05	40.2301	-111.713	-127.099	0.0434066	-16.9662	0.024192
	SOU11	2015-06-05	40.2301	-111.709	-127.366	0.0434066	-16.9488	0.024192
	SOU12	2015-06-05	40.2299	-111.707	-127.207	0.0434066	-16.9395	0.024192
	SOU13	2015-06-05	40.2263	-111.713	-127.748	0.0434066	-16.9777	0.024192
	SOU14	2015-06-08	40.2346	-111.724	-127.538	0.0434066	-17.0061	0.024192
	SOU15	2015-06-08	40.2331	-111.715	-126.789	0.0434066	-16.8549	0.024192
	SOU16	2015-06-11	40.0867	-111.708	-125.732	0.0434066	-16.9807	0.024192
	SOU17	2015-06-11	40.0905	-111.708	-125.545	0.0434066	-16.7877	0.024192
	SOU18	2015-06-11	40.0964	-111.709	-125.984	0.0434066	-17.0045	0.024192
	SOU19	2015-06-11	40.0983	-111.716	-128.202	0.0434066	-17.193	0.024192
	SOU20	2015-06-11	40.098	-111.737	-125.22	0.0434066	-16.6722	0.024192
	SOU21	2015-06-12	40.0338	-111.679	-114.09	0.0434066	-14.4169	0.024192
	SOU22	2015-06-12	40.0375	-111.689	-112.892	0.0434066	-14.5047	0.024192
	SOU23	2015-06-12	40.038	-111.69	-115.001	0.0434066	-14.796	0.024192
	SOU24	2015-06-15	40.0378	-111.69	-111.175	0.0434066	-14.2499	0.024192
	SOU25	2015-06-15	40.0477	-111.7	-124.191	0.0434066	-16.4802	0.024192
	SOU26	2015-06-15	40.1178	-111.615	-126.14	0.0434066	-17.0115	0.024192
	SOU27	2015-06-17	40.13	-111.608	-111.381	0.0434066	-14.0674	0.024192
	SOU28	2015-06-19	40.1442	-111.674	-125.086	0.0434066	-16.5463	0.024192
	SOU29	2015-06-22	40.1459	-111.677	-124.988	0.0434066	-16.5525	0.024192
	SOU30	2015-06-22	40.1411	-111.682	-125.542	0.0434066	-16.6714	0.024192
	SOU31	2015-06-22	40.1371	-111.689	-124.984	0.0434066	-16.5888	0.024192
	SOU32	2015-06-25	40.156	-111.674	-124.615	0.0434066	-16.5152	0.024192
	SOU33	2015-06-25	40.1511	-111.673	-124.725	0.0434066	-16.7049	0.024192
	SOU34	2015-06-26	40.1514	-111.697	-125.043	0.0434066	-16.9374	0.024192
	SOU35	2015-06-26	40.1504	-111.696	-124.65	0.0434066	-16.5406	0.024192
	SOU36	2015-06-26	40.0861	-111.73	-127.63	0.0434066	-17.0094	0.024192
	SOU37	2015-06-29	40.0862	-111.731	-125.947	0.0434066	-16.9029	0.024192
	SOU38	2015-06-29	40.0984	-111.746	-125.49	0.0434066	-16.9159	0.024192
	SOU39	2015-06-30	40.0962	-111.769	-126.004	0.0434066	-16.9762	0.024192
	SOU40	2015-07-01	40.1094	-111.806	-119.512	0.0434066	-15.6101	0.024192
	SOU41	2015-07-01	40.1157	-111.806	-115.012	0.0434066	-14.6851	0.024192
	SOU42	2015-07-02	40.1575	-111.728	-133.982	0.0434066	-17.8642	0.024192
	SOU43	2015-07-06	40.152	-111.725	-125.063	0.0434066	-16.7144	0.024192
	SOU44	2015-07-06	40.1455	-111.715	-124.675	0.0434066	-16.7165	0.024192
	SOU45	2015-07-13	40.2341	-111.715	-126.689	0.0434066	-16.7858	0.024192
	SOU46	2015-07-14	40.2342	-111.715	-126.694	0.0434066	-16.8189	0.024192
	SOU47	2015-07-14	40.1334	-111.619	-126.51	0.0434066	-17.0162	0.024192
	SOU48	2015-07-16	40.1877	-111.611	-112.427	0.0434066	-14.2388	0.024192
	SOU49	2015-07-16	40.1581	-111.703	-112.975	0.0434066	-14.351	0.024192
	SOU50	2015-07-17	40.1526	-111.731	-116.283	0.0434066	-14.96	0.024192
	*WGS 84 Datum
